# Supplementary material for: Functional graphene springs for responsive actuation
Source: Royal Society of Chemistry journal article supplement (doi:10.1039/c4nr03409k), 2014-01-01
Supplement: c4nr03409k1.pdf [file c4nr03409k1.pdf]

## Electronic Supplementary Information

### Functional Graphene Springs for Responsive Actuation

*Huhu Cheng, Yuan Liang, Fei Zhao, Yue Hu, Zelin Dong, Lan Jiang, and Liangti Qu\**

#### Experimental Section

Fabrication of GFS: For preparation of GF, 8 mg/mL aqueous graphene oxide (GO) suspension was injected into the glass pipeline and was then baked in an oven at 230 °C for 2 h after sealing up the two ends of the pipeline as we reported previously.<sup>1, 2</sup> The GFS was fabricated by wrapping the as-prepared wet GF around the cylindrical objects, followed by annealing it under 500 °C in tubular furnace. The magnetic GF was prepared by mixing Fe<sub>3</sub>O<sub>4</sub> nanoparticles (20 nm) with 8 mg/mL GO suspension under ultrasonication (weight ratio of Fe<sub>3</sub>O<sub>4</sub>/GO = 1:10), followed by hydrothermal process within pipelines as mentioned above for in-situ incorporation of Fe<sub>3</sub>O<sub>4</sub> nanoparticles into the interlayers of graphene sheets. Accordingly, magnetic GFS was fabricated by wrapping the wet Fe<sub>3</sub>O<sub>4</sub>/GF around the cylindrical objects, followed by annealing it under 500 °C in tubular furnace.

Characterizations: The whole stretching process of GFS was recorded by a digital video camera recorder. The length change was obtained by analysis of the video. The morphology and X-ray energy disperse spectra (EDS) of the samples was examined by scanning electron

microscope (SEM, JSM-7001F). The electric character of GFS was measured by using CHI 660D electrochemical workstation. Mechanical property test of GFS was conducted with an AGS-X material testing system (SHIMADZU).

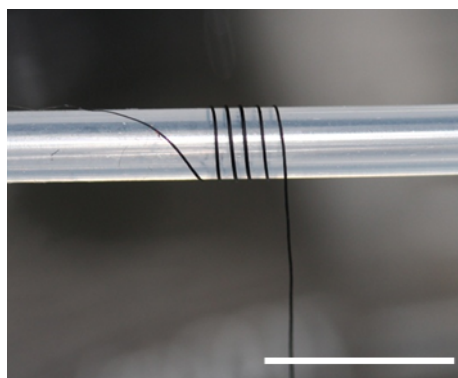

**Fig. S1** Photo of wet GF winding around the glass rod. Scale bar: 1 cm.

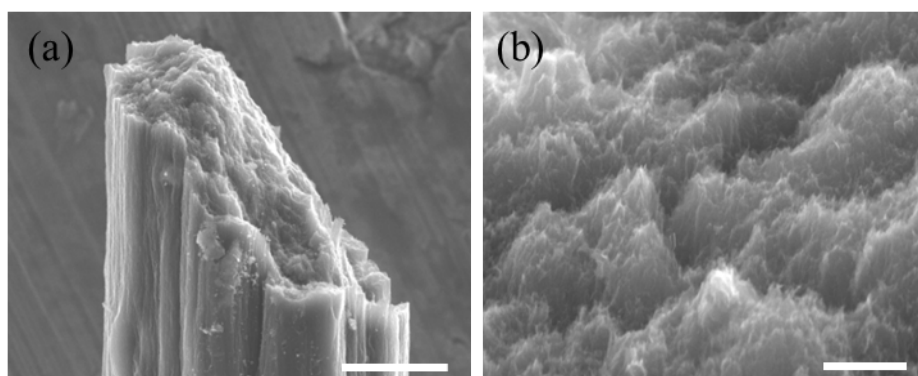

**Fig. S2** SEM images of the cross-section (a) of a GFS and the enlarged view (b). Scale bars: a, 10  $\mu\text{m}$ ; b, 1  $\mu\text{m}$ .

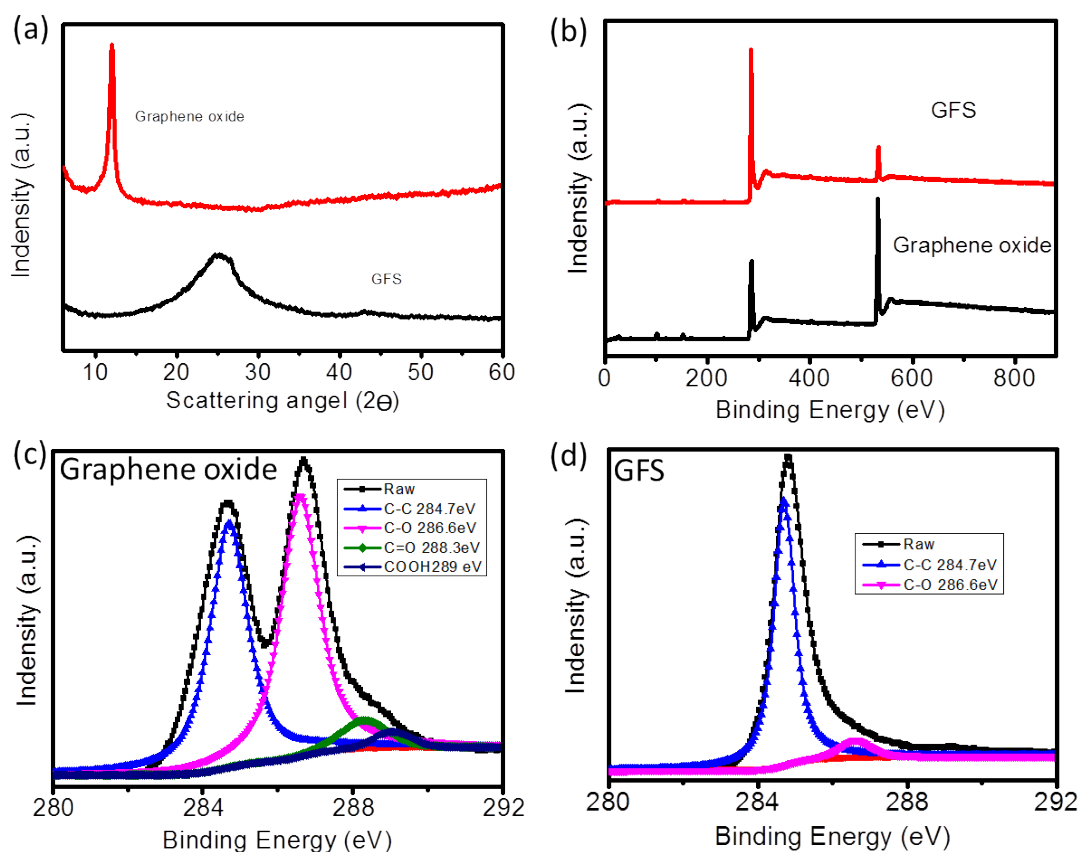

**Fig. S3** (a) X-ray diffraction (XRD) patterns of graphene oxide (GO) and GFS. The typical diffraction peak of GO at approximately  $11^\circ$  has completely disappeared for GFS. (b) X-ray photoelectron spectroscopy (XPS) of GO and GFS. (c) and (d) The C1s spectrum of GO and GFS. The O/C atomic ratio is roughly 1:9, which is largely lower than that in GO (1:2). The C1s spectrum of the original GO reveals four types of carbon containing bond: C=C/C-C (284.7eV), C-O (286.6eV), C=O (288.3eV), and O-C-O (289.0eV). However, for GFS, the C-C bonds become dominant. The results indicated that the oxygen containing groups of GFS had been removed significantly compared to GO.

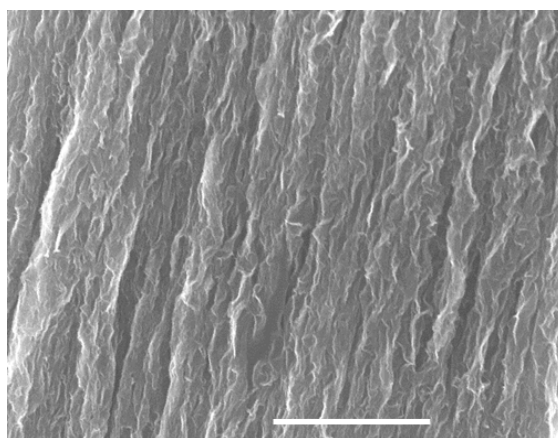

**Fig. S4** SEM image of GFS surface after mechanical testing. Scale bar:  $2\mu\text{m}$ .

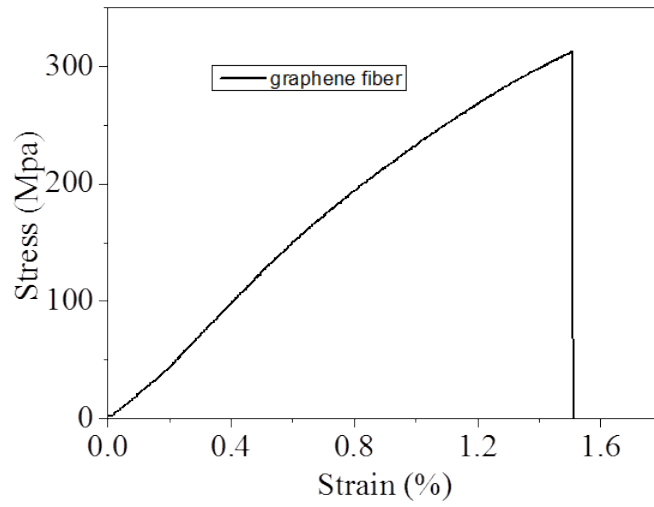

**Fig. S5** Stress-strain curve of graphene fiber.

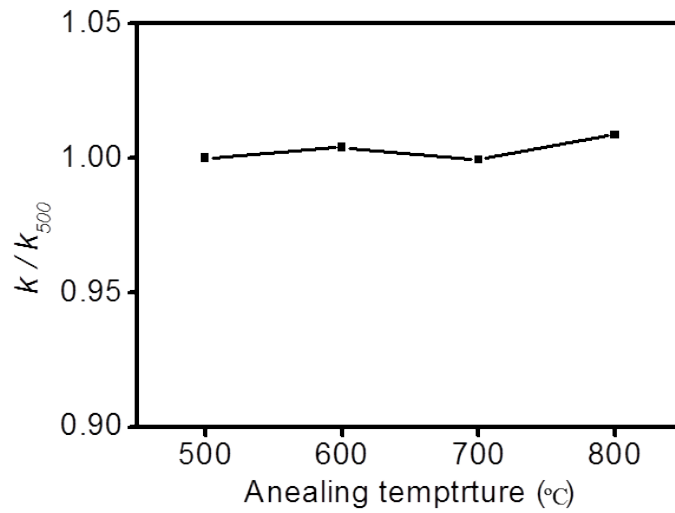

**Fig. S6** This ratio of elasticity coefficient ( $k$ ) change of GFS after different temperature annealing.  $k_{500}$  stands for the elasticity coefficient of GFS after annealing under 500°C.

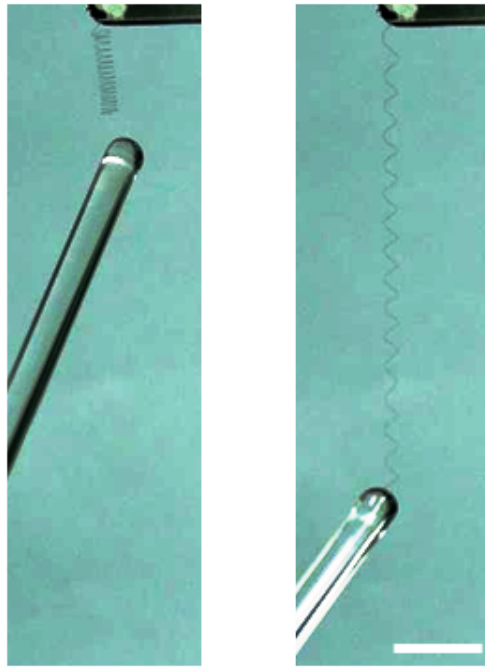

**Fig. S7** Photos of GFS (left) and stretched (right) by a static electricity-charged glass rod. Scale bar: 1 cm.

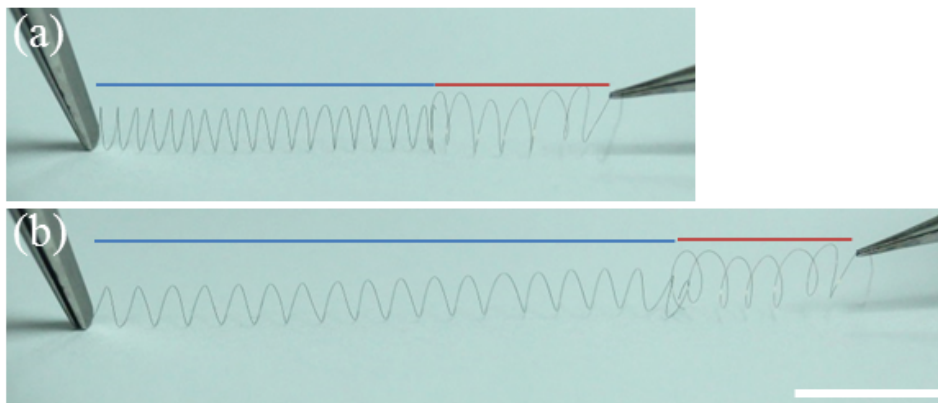

**Fig. S8** (a) Photos of GFS (left) and the copper spring (right) which have the same fiber diameter. (b) GFS stretched up to 200% of its original length when copper spring had no length change. Scale bar: 1 cm.

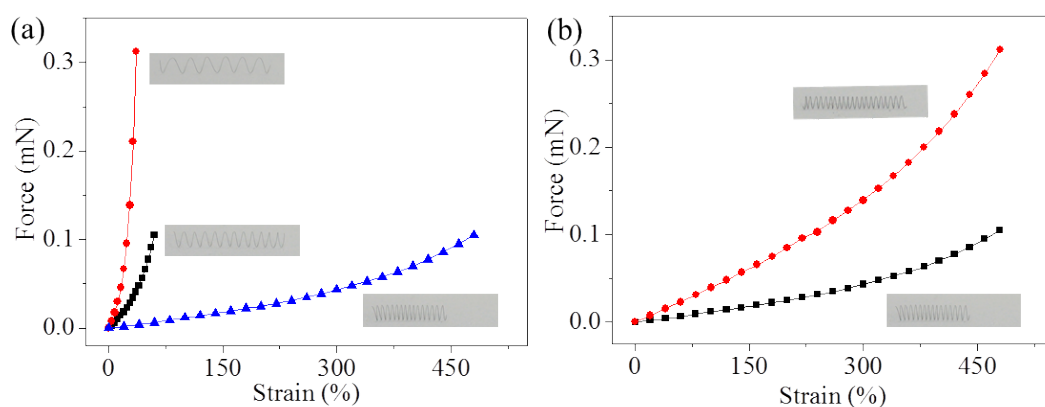

**Fig. S9** Force-strain curves of different spring with different loops distance ( $l$ ) and spring diameter ( $D$ ). From up to down, (a)  $l = 3\text{mm}, 2\text{mm}, 1\text{mm}$ , (b)  $D = 2\text{mm}, 3\text{mm}$ . respectively.

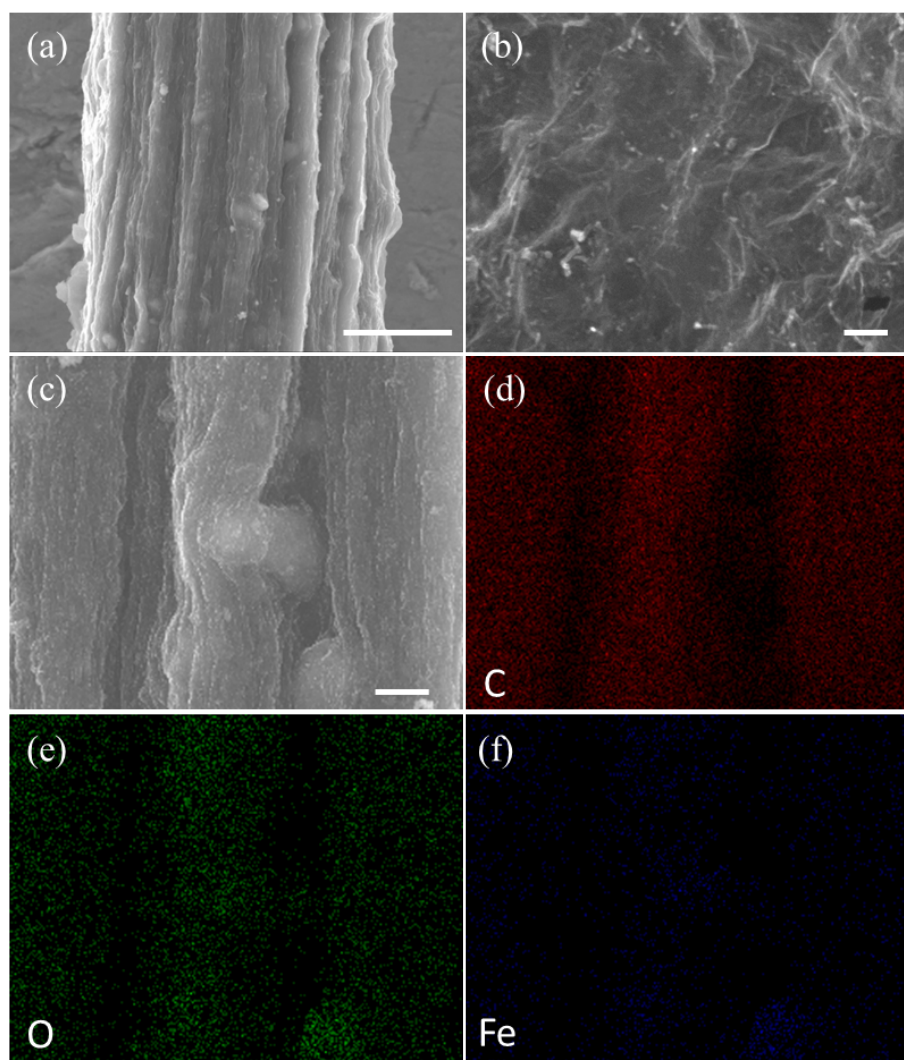

**Fig. S10** The surface (a, c) and cross-sectional (b) SEM images of  $\text{Fe}_3\text{O}_4\text{-GFS}$ , respectively. (d–f) C, O, Fe elemental mappings of (c) determined by EDS.

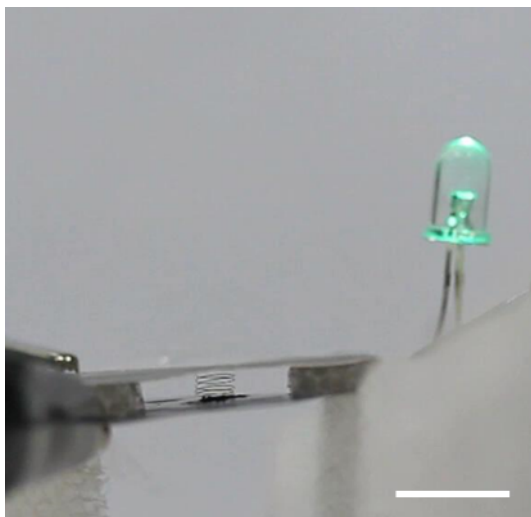

**Fig. S11** Photo of  $\text{Fe}_3\text{O}_4$ -GFS switch at on state. Scale bar: 1cm.

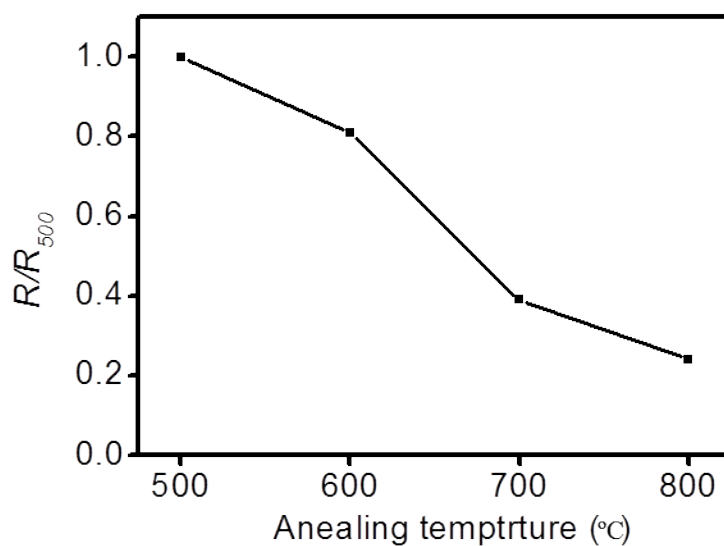

**Fig. S12** The relative electrical resistance change ( $R/R_{500}$ ) of  $\text{Fe}_3\text{O}_4$ -GFS after different temprture annealing.  $R_{500}$  is the initial resistance of GFS after 500°C annealing. The results indicat the reduced electrical resistance of GFS under higher annealing temprture.

**Supporting Movie Caption:**

Movie S1. The stretching behavior of a GFS under electrostatic field.

Movie S2. The magnet actived  $\text{Fe}_3\text{O}_4$ -GFS switch.

[s1] Z. L. Dong, C. C. Jiang, H. H. Cheng, Y. Zhao, G. Q. Shi, L. Jiang, L. T. Qu, *Adv. Mater.*, **2012**, *24*, 1856–1861.

[s2] C. G. Hu, Y. Zhao, H. H. Cheng, Y. Wang, Z. L. Dong, C. C. Jiang, X. Q. Zhai, L. Jiang, L. T. Qu, *Nano Lett.*, **2012**, *12*, 5879–5884.
